# Supplementary material for: The AAA-ATPase Yta4/ATAD1 interacts with the mitochondrial divisome to inhibit mitochondrial fission
Source: PubMed Central journal article supplement (PMC10465003; doi:10.1371/journal.pbio.3002247), 2023-08-17

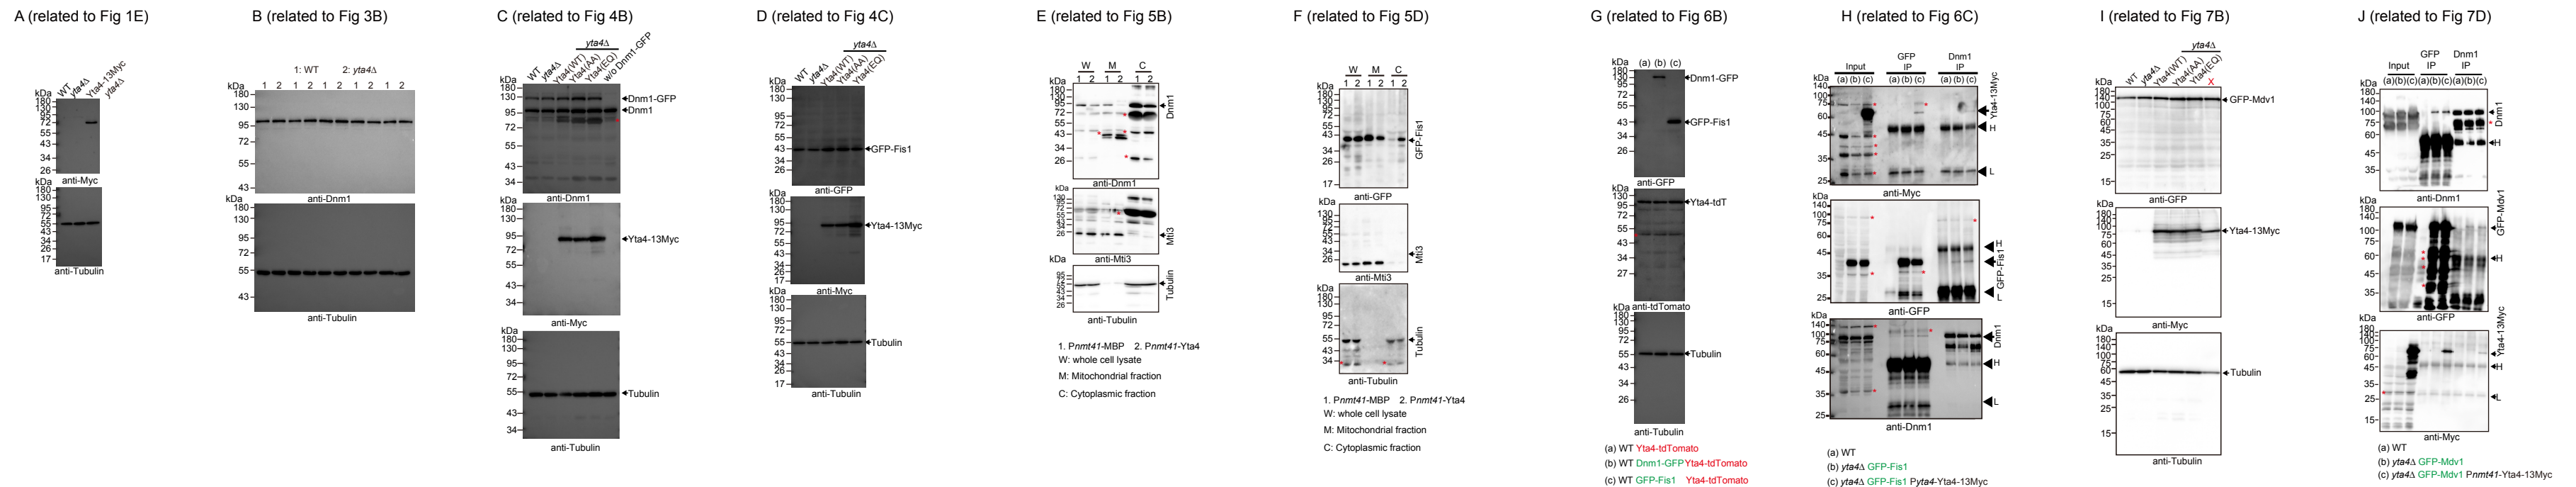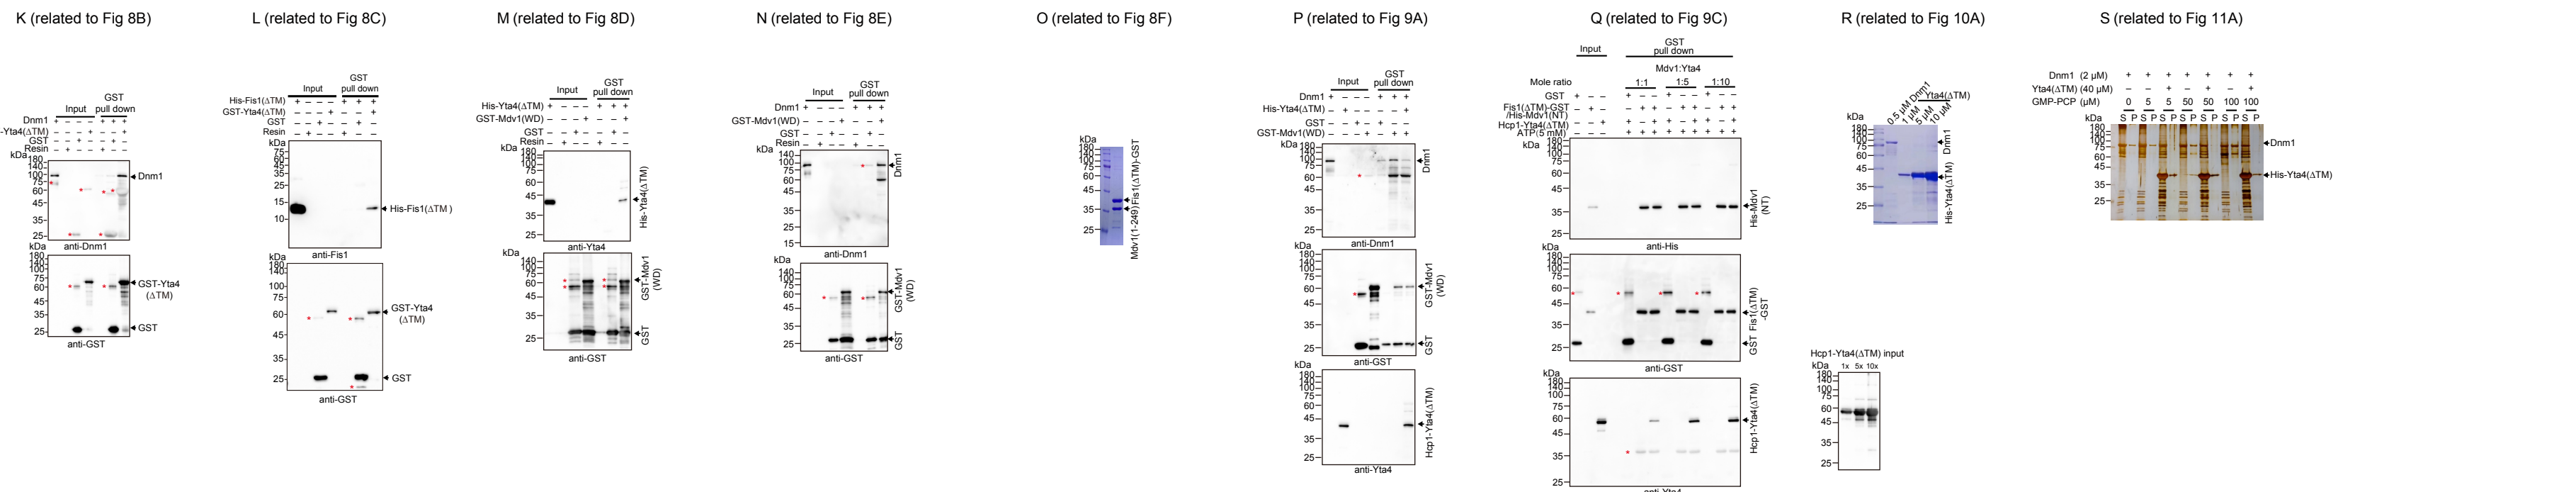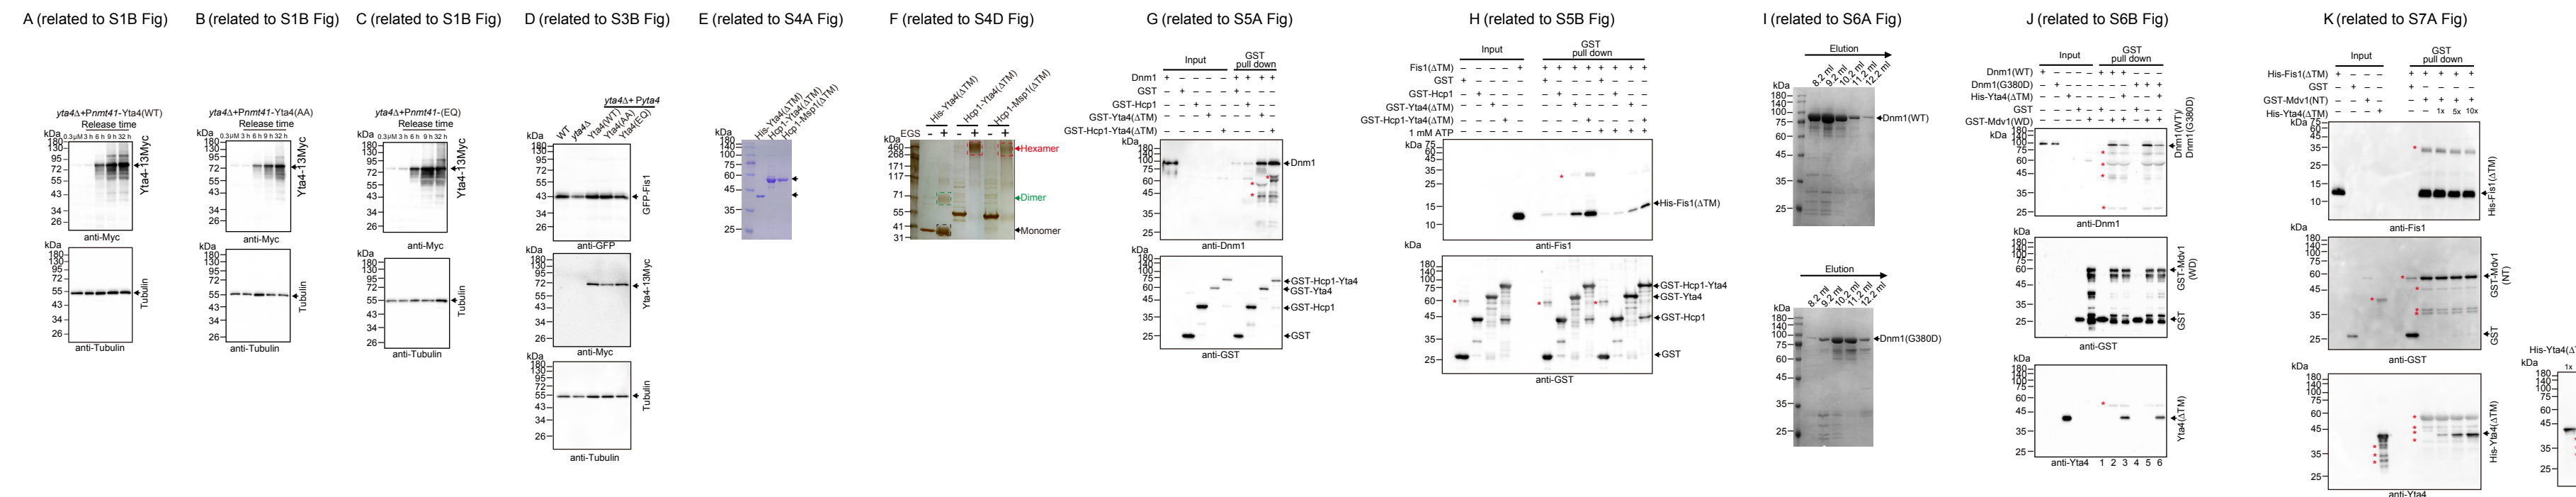

Supplement: pbio.3002247.s009.pdf [file pbio.3002247.s009.pdf]
